# Supplementary material
Source: HighWire-hosted journal article supplement (https://bmjopen.bmj.com/content/9/1/e024689)
Supplement: inline-supplementary-material-1 [file inline-supplementary-material-1.pdf]

**Supplementary table1: Correlates of atrophic gastritis by population group**

| Variable                                | Adjusted OR<br>(95% CI) <sup>a</sup> | P <sup>a</sup> | Adjusted OR<br>(95% CI) <sup>b</sup> | P <sup>b</sup> |
|-----------------------------------------|--------------------------------------|----------------|--------------------------------------|----------------|
| <b>Jewish participants</b>              |                                      |                |                                      |                |
| <b>Sex</b>                              |                                      |                |                                      |                |
| Males                                   | Reference                            |                | Reference                            |                |
| Females                                 | 1.51 (0.78, 2.90)                    | 0.21           | 1.32 (0.73, 2.41)                    | 0.35           |
| <b>Age, years</b>                       | df=2                                 | 0.006          | df=2                                 | 0.027          |
| 25-44                                   | Reference                            |                | Reference                            |                |
| 45-64                                   | 4.96 (1.46, 16.89)                   | 0.01           | 2.91 (1.17, 7.25)                    | 0.021          |
| 65-78                                   | 7.84 (2.21, 27.78)                   | 0.001          | 3.72 (1.40, 9.86)                    | 0.008          |
| <b>H. pylori IgG sero-positivity</b>    | df=2                                 | 0.15           | df=2                                 | 0.4            |
| <i>H. pylori</i> negative               | Reference                            |                | Reference                            |                |
| <i>H. pylori</i> positive CagA negative | 1.06 (0.49, 2.28)                    | 0.8            | 0.79 (0.49, 1.94)                    | 0.9            |
| <i>H. pylori</i> positive CagA positive | 2.06 (0.91, 4.68)                    | 0.084          | 1.50 (0.66, 3.24)                    | 0.2            |
| <b>Smoking</b>                          |                                      |                |                                      |                |
| ≥1 cigarettes/ day                      | 0.60 (0.20, 1.77)                    | 0.36           | 0.46 (0.16, 1.33)                    | 0.15           |
| No smoking/else                         | Reference                            |                | Reference                            |                |
| <b>Physical activity</b>                |                                      |                |                                      |                |
| No                                      | Reference                            |                | Reference                            |                |
| Yes                                     | 4.52 (0.60, 34.00)                   | 0.14           | 2.49 (0.58, 10.65)                   | 0.2            |
| <b>Arab participants</b>                |                                      |                |                                      |                |
| <b>Sex</b>                              |                                      |                |                                      |                |
| Males                                   | Reference                            |                | Reference                            |                |
| Females                                 | 1.40 (0.84, 2.34)                    | 0.19           | 1.68 (1.04, 2.71)                    | 0.032          |
| <b>Age, years</b>                       | df=2                                 | 0.002          | df=2                                 | <0.001         |
| 25-44                                   | Reference                            |                | Reference                            |                |
| 45-64                                   | 3.33 (1.66, 6.65)                    | 0.001          | 3.44 (1.81, 6.52)                    | <0.001         |
| 65-78                                   | 3.59 (1.67, 7.69)                    | 0.001          | 4.05 (2.00, 8.19)                    | <0.001         |
| <b>H. pylori IgG sero-positivity</b>    | df=2                                 | <0.001         | df=2                                 | <0.001         |
| <i>H. pylori</i> negative               | Reference                            |                | Reference                            |                |
| <i>H. pylori</i> positive CagA negative | 0.19 (0.11, 0.33)                    | <0.001         | 0.22 (0.13, 0.37)                    | <0.001         |
| <i>H. pylori</i> positive CagA positive | 0.21 (0.11, 0.37)                    | <0.001         | 0.25 (0.14, 0.42)                    | <0.001         |
| <b>Smoking</b>                          |                                      |                |                                      |                |
| ≥1 cigarettes/ day                      | 0.83 (0.45, 1.55)                    | 0.5            | 0.82 (0.45, 1.45)                    | 0.4            |
| No smoking/else                         | Reference                            |                | Reference                            |                |
| <b>Physical activity</b>                |                                      |                |                                      |                |
| No                                      | Reference                            |                | Reference                            |                |
| Yes                                     | 0.61 (0.35, 1.05)                    | 0.079          | 0.73 (0.44, 1.23)                    | 0.2            |

Odds ratios (OR), 95% confidence intervals (CI);

<sup>a</sup> The dependent variable was atrophic gastritis was defined as PGI<40 µg/L or PGI: PGII<3

<sup>b</sup> The dependent variable was atrophic gastritis was defined as PGI<50 µg/L or PGI: PGII<3  
Adjusted for the variables in the table.
